# Supplementary material for: Room temperature multiferroicity in Bi4.2K0.8Fe2O9+δ
Source: PubMed Central journal article supplement — Sci Rep. 2013 Feb 13;3:1245. doi: 10.1038/srep01245 (PMC3570784; doi:10.1038/srep01245), 2013-02-13
Supplement: srep01245-s1.pdf [file srep01245-s1.pdf]

## Supplementary Information

### Room temperature multiferroicity in $\text{Bi}_{4.2}\text{K}_{0.8}\text{Fe}_2\text{O}_{9+\delta}$

Si-Ning Dong<sup>1</sup>, Yi-Ping Yao<sup>1</sup>, Jian-Qi Li<sup>2</sup>, Yuan-Jun Song<sup>2</sup>, Yu-Kuai Liu<sup>1</sup>, and Xiao-Guang Li<sup>1,\*</sup>

<sup>1</sup>Hefei National Laboratory for Physical Sciences at Microscale, Department of Physics, CAS Key Lab Mat Energy Convers, University of Science and Technology of China (USTC), Hefei 230026, P. R. China

<sup>2</sup>Beijing National Laboratory for Condensed Matter Physics, Institute of Physics, Academia Sinica, Beijing 100190, P. R. China

\*To whom correspondence should be addressed. E-mail: [lixg@ustc.edu.cn](mailto:lixg@ustc.edu.cn)

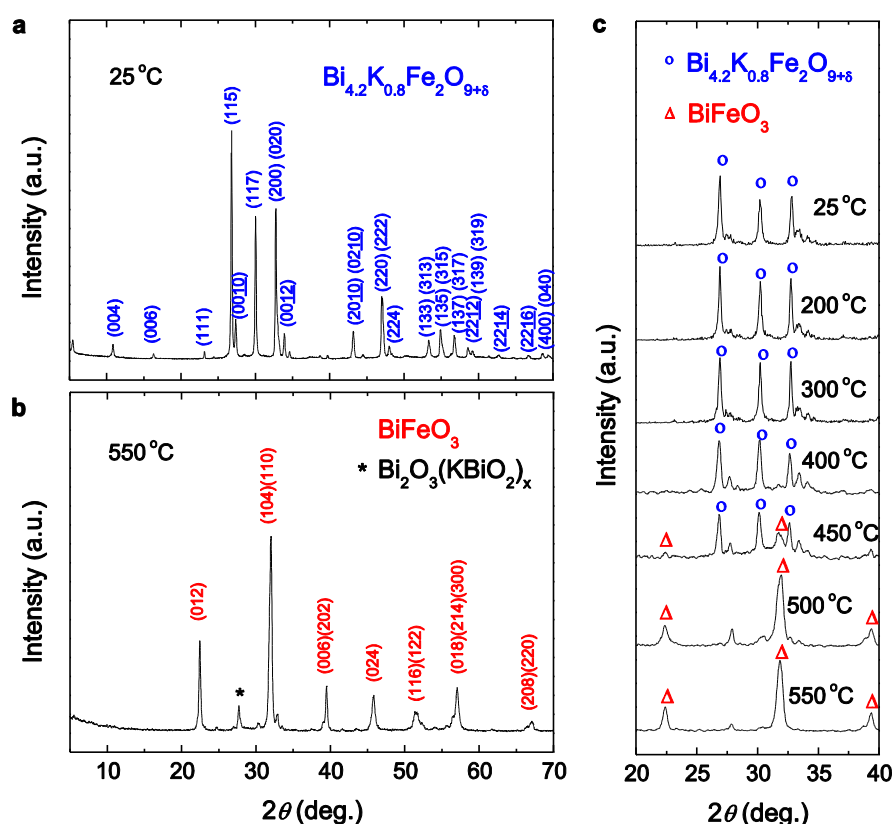

**Supplementary Fig. S1** | **a**, X-ray diffraction patterns ( $5^\circ \leq 2\theta \leq 70^\circ$ ) of the  $\text{Bi}_{4.2}\text{K}_{0.8}\text{Fe}_2\text{O}_{9+\delta}$  nanobelts at 25 °C; **b**, for the sample at 550 °C, which is mainly decomposed to  $\text{BiFeO}_3$  with a  $\text{Bi}_2\text{O}_3(\text{KBiO}_2)_x$  impurity phase (marked by asterisks); and **c**, X-ray diffraction patterns ( $20^\circ \leq 2\theta \leq 40^\circ$ ) for the sample at different temperatures (the strong diffraction peaks of  $\text{Bi}_{4.2}\text{K}_{0.8}\text{Fe}_2\text{O}_{9+\delta}$  are marked with open blue circles and those of  $\text{BiFeO}_3$  are marked with open red triangles). The results demonstrate that the  $\text{Bi}_{4.2}\text{K}_{0.8}\text{Fe}_2\text{O}_{9+\delta}$  nanobelts will be decomposed above 450 °C. Therefore, the thermal instability of the  $\text{Bi}_{4.2}\text{K}_{0.8}\text{Fe}_2\text{O}_{9+\delta}$  makes it a difficulty to obtain the corresponding bulk materials (big single crystal or dense ceramic) through a conventional solid state reaction method so far.

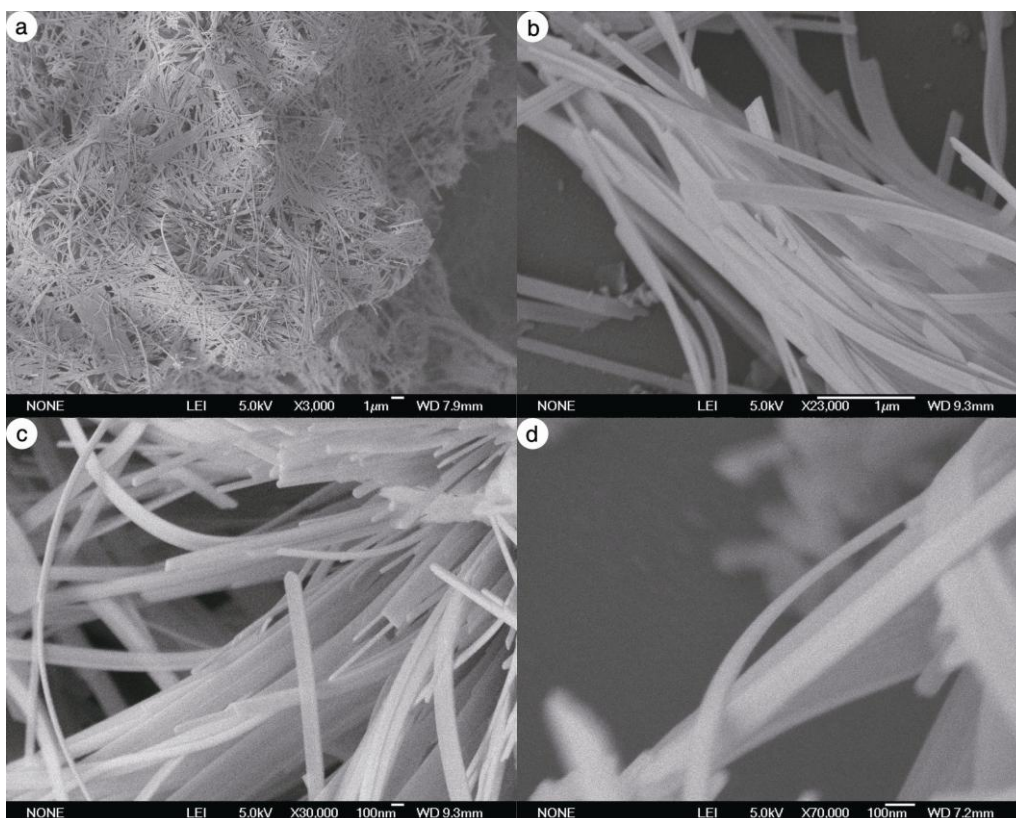

**Supplementary Fig. S2** | Scanning electron microscopy (SEM) images of the  $\text{Bi}_{4.2}\text{K}_{0.8}\text{Fe}_2\text{O}_{9+\delta}$  nanobelts with different magnifications.

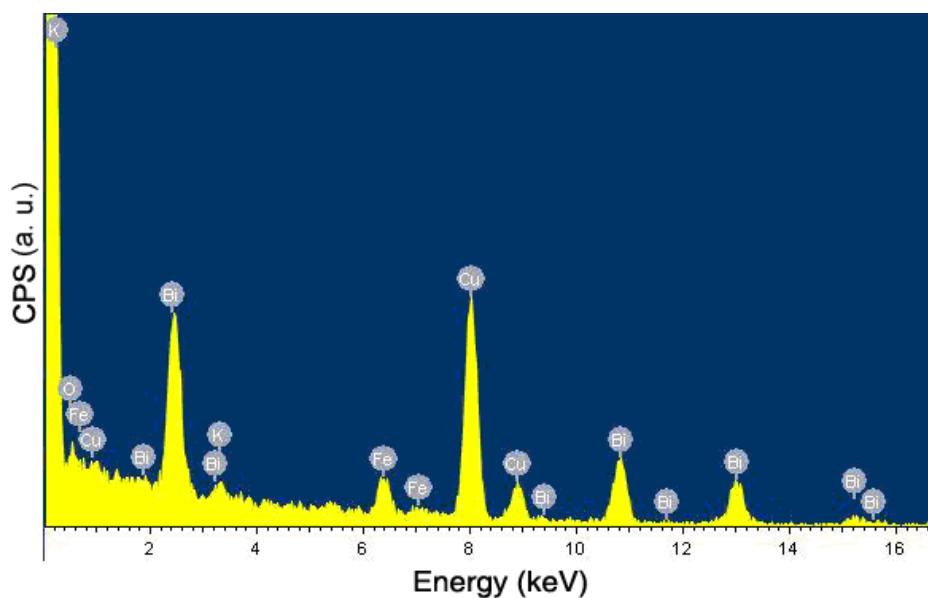

**Supplementary Fig. S3** | Energy-dispersive X-ray spectrometry (EDS) of the  $\text{Bi}_{4.2}\text{K}_{0.8}\text{Fe}_2\text{O}_{9+\delta}$  nanobelts. For the measurement the nanobelts are dispersed on the copper grids.

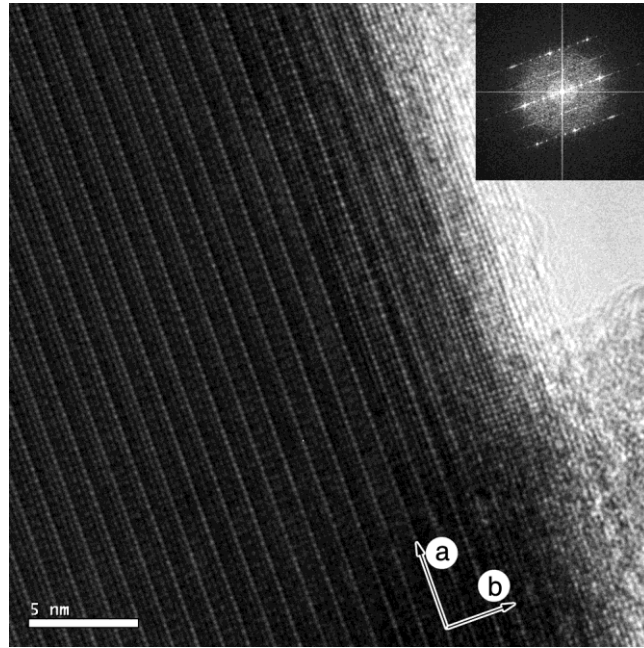

**Supplementary Fig. S4** | High-resolution transmission electron microscopy (HRTEM) image of the edge of a single nanobelt, the inset is the Fourier transform of the HRTEM image.

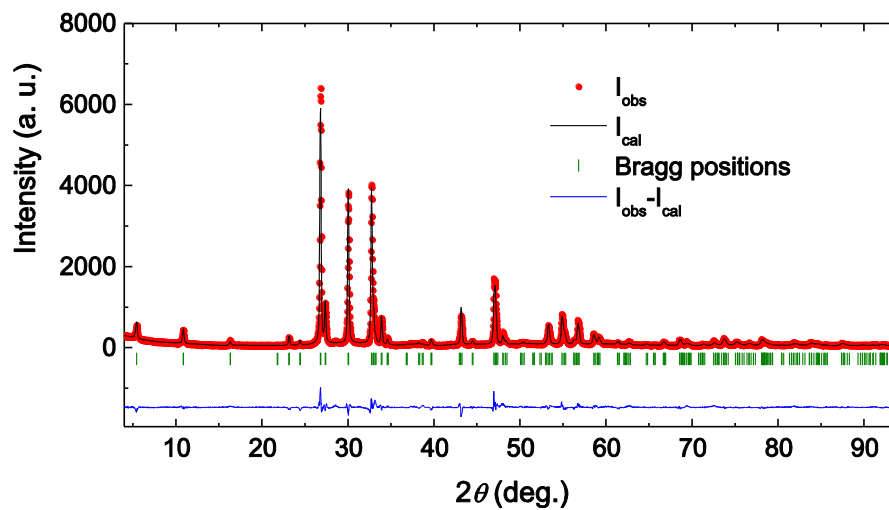

**Supplementary Fig. S5** | Preliminary Rietveld refinements for the powder XRD patterns ( $4^\circ \leq 2\theta \leq 94^\circ$ ) of the  $\text{Bi}_{4.2}\text{K}_{0.8}\text{Fe}_2\text{O}_{9+\delta}$  nanobelts using the Fullprof software (Ref: Rodriguez-carvajal, J. Recent Advances in Magnetic-Structure Determination by Neutron Powder Diffraction. *Physica B* **192**, 55-69 (1993)). The refinements are started with the space group **Fm**mm without considering the modulated structure and the final conventional Rietveld  $R$ -factors (without the deduction of the background signal) are:  $R_p = 18.4$ ,  $R_{wp} = 19.2$  and  $R_{exp} = 13.04$ . The calculated results agree with the experimental diffraction patterns. Moreover, the refinements have confirmed that the K atoms occupy some of the Bi sites in the perovskite layers not the rock salt layers.

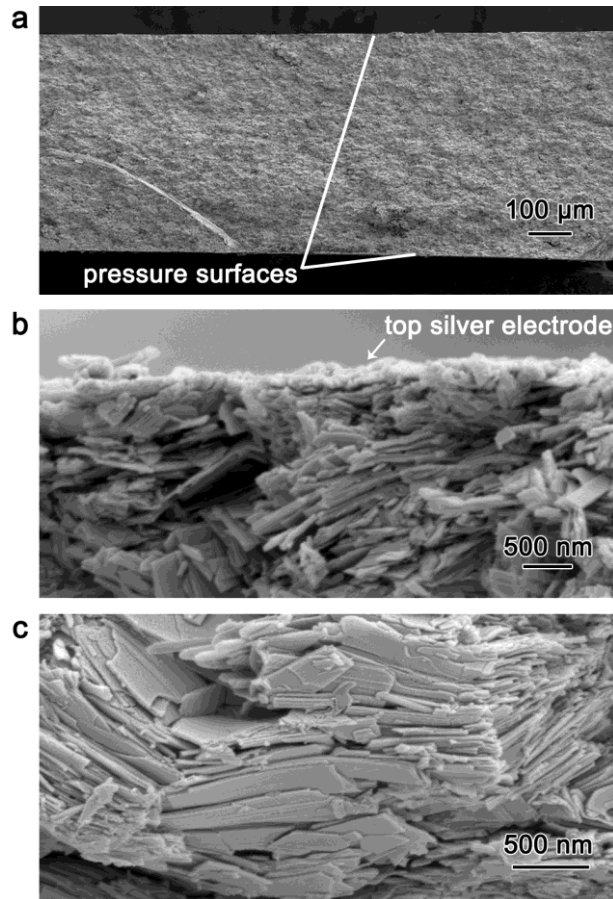

**Supplementary Fig. S6** | SEM images of the cross-section of a  $\text{Bi}_{4.2}\text{K}_{0.8}\text{Fe}_2\text{O}_{9+\delta}$  bulk for the electric measurements. **a**, low-magnification view; **b** and **c**, high-magnification images taken at the top surface and center regions of the bulk, respectively, without rotating the sample direction. One can see a large amount of nanobelts with the **c**-axes perpendicular to the pressure surface, some nanobelts with the **b**-axes perpendicular to the pressure surface, and other intermediately oriented nanobelts.

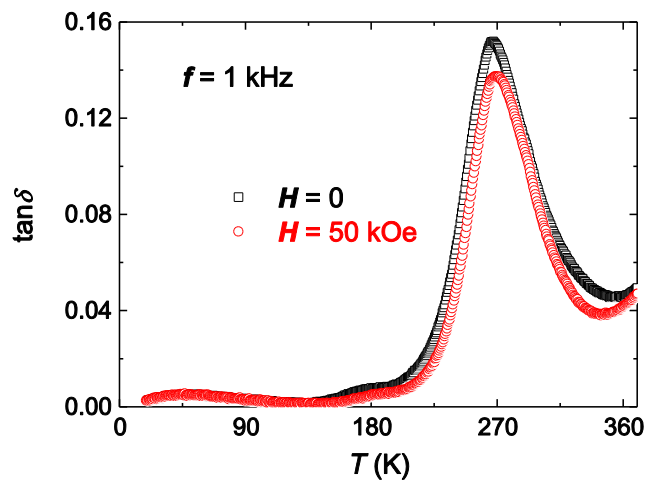

**Supplementary Fig. S7** | Temperature dependencies of dielectric loss  $\tan\delta$  of the bulks made of the  $\text{Bi}_{4.2}\text{K}_{0.8}\text{Fe}_2\text{O}_{9+\delta}$  nanobelts at 1 kHz under zero (black open square) and 50 kOe (red open circle) magnetic fields, respectively.
